# Supplementary material for: Genetic variation in adaptability and pleiotropy in budding yeast
Source: eLife. 2017 Aug 17;6:e27167. doi: 10.7554/eLife.27167 (PMC5580887; doi:10.7554/eLife.27167)
Supplement: Figure 6—source data 1. [file elife-27167-fig6-data1.xlsx]

## Sheet: Sheet 1 - Mutual Information wi
Mutual Information with de novo mutations
	Added Mutual Information (95% confidence intervals)	p
KRE33 allele	.34 (.3, .38)	< .0001
Environment	.09 (.04, .13)	0.0006
Genotype	.15 (.06, .23)	0.001
