# Supplementary material for: Genetic variation in adaptability and pleiotropy in budding yeast
Source: eLife journal article supplement (doi:10.7554/elife.27167), 2017-08-17
Supplement: supp [file elife_poa_e27167_Figure_3_Source_Data_1.xlsx]

## Sheet: Export Summary
	This document was exported from Numbers. Each table was converted to an Excel worksheet. All other objects on each Numbers sheet were placed on separate worksheets. Please be aware that formula calculations may differ in Excel.
	Numbers Sheet Name	Numbers Table Name	Excel Worksheet Name
	QTL model, adaptability at OT
		Table 2	QTL model, adaptability at OT -
		Table 1	QTL model, adaptability at OT 1
		Table 1-1	QTL model, adaptability at OT 2
		"All Drawings from the Sheet"	QTL model, adaptability at OT 3
	QTL model, adaptability at HT
		Table 2	QTL model, adaptability at HT -
		Table 1	QTL model, adaptability at HT 1
		"All Drawings from the Sheet"	QTL model, adaptability at HT 2
	Combined Fitness and QTL Model
		Table 1	Combined Fitness and QTL Model
	Combined Fitness and QTL Model1
		Table 1	Combined Fitness and QTL Model1

## Sheet: QTL model, adaptability at OT
Term	Locus	Coefficient	Added variance explained (nested model)	Coefficient for ‘best linear predictor’ variable (Figure 3A; note that this variable is the same as the linear combination specified in col. 3, centered and scaled to standard deviation 1)
α	intercept	0.04	NA	-1.32
a1	ChrXIV 376315	0.034	0.27	1.64
a2	ChrXV 154799	0.015	0.06	0.75
a3	ChrIV 1091232	-0.014	0.056	-0.67
a4	ChrXII 210540	0.014	0.047	0.66

## Sheet: QTL model, adaptability at HT
Term	Locus	Coefficient	Added variance explained (nested model)	Coefficient for ‘best linear predictor’ variable (Figure 3D; note that this variable is the same as the linear combination specified in col. 3, centered and scaled to standard deviation 1)
α	intercept	0.097	NA	-1.37
a1	ChrXIV 376315	0.088	0.371	1.89
a2	ChrXII 210540	0.034	0.051	0.7

## Sheet: Combined Fitness and QTL Model 
Term	Locus	Coefficient	Added variance explained	F (nested model)	Coefficient for ‘best linear predictor’ variable (Figure 3C; note that this variable is the same as the linear combination specified in col. 3, centered and scaled to standard deviation 1)
α	intercept	0.055	NA	NA	-0.48
β	founder fitness	-0.634	0.417	NA	-23.9
γ	ChrXIV 376315	-0.024	0.004	9.6	-0.91
a1	ChrXIV 466590	0.017	0.031	66.8	-0.64
a2	ChrXII 646707	0.013	0.033	65.9	0.49
a3	ChrXII 210540	0.009	0.015	27.9	0.35

## Sheet: Combined Fitness and QTL Model1
	Term	Locus	Coefficient	Added variance explained	F (nested model)	Coefficient for ‘best linear predictor’ variable (Figure 3F; note that this variable is the same as the linear combination specified in col. 3, centered and scaled to standard deviation 1)
	α	intercept	0.128	NA	NA	-0.53
	β	founder fitness	-0.7	0.522	NA	-11.05
	γ	ChrXIV 376315	0.038	0.02	32.3	-0.61
	b1	ChrXIV 376315, ChrXV 154799	-0.053	0.021	32.3	-0.81
	b2	ChrXIV 376315, ChrXIV 466590	-0.048	0.014	21.7	-0.74
