# Supplementary material for: Genetic variation in adaptability and pleiotropy in budding yeast
Source: eLife journal article supplement (doi:10.7554/elife.27167), 2017-08-17
Supplement: supp [file elife_poa_e27167_Figure_8_Source_Data_1.xlsx]

## Sheet: Combined fitness and QTL model 
Combined fitness and QTL model for pleiotropy — fitness gains of OT populations at HT
Term	Locus	Coefficient	Added variance explained	F (nested model)	Coefficient for ‘best linear predictor’ variable (Figure 7C; note that this variable is the same as the linear combination specified in col. 3, centered and scaled to standard deviation 1)
α	intercept	0.079	NA	NA	0.008
β	founder fitness, HT	-0.488	0.17	NA	-15
a1	ChrXIV 376315	-0.065	0.026	191.6	-2
a2	ChrXV 154799	-0.01	0.004	23.7	-0.31
a3	ChrXIV 466590	0.02	0.011	65.3	0.61
a4	ChrXII 644077	0.01	0.004	22.1	0.31
a5	ChrXIV 254149	-0.006	0.001	6.9	-0.19

## Sheet: Combined fitness and QTL model1
	Term	Locus	Coefficient	Added variance explained	F (nested model)	Coefficient for ‘best linear predictor’ variable (Figure 7D; note that this variable is the same as the linear combination specified in col. 3, centered and scaled to standard deviation 1)
	α	intercept	0.052	NA	NA	-0.58
	β	founder fitness, OT	-0.54	0.425	NA	-18.3
	a1	ChrXII 644077	0.054	0.026	12.3	0.18
	a2	ChrXIV 254149	-0.008	0.004	17.6	-0.25
	a3	ChrXII 210540	0.014	0.011	51.8	0.49
