# Supplementary figures and images for: Genetic variation in adaptability and pleiotropy in budding yeast
Source: eLife journal article supplement (doi:10.7554/elife.27167), 2017-08-17

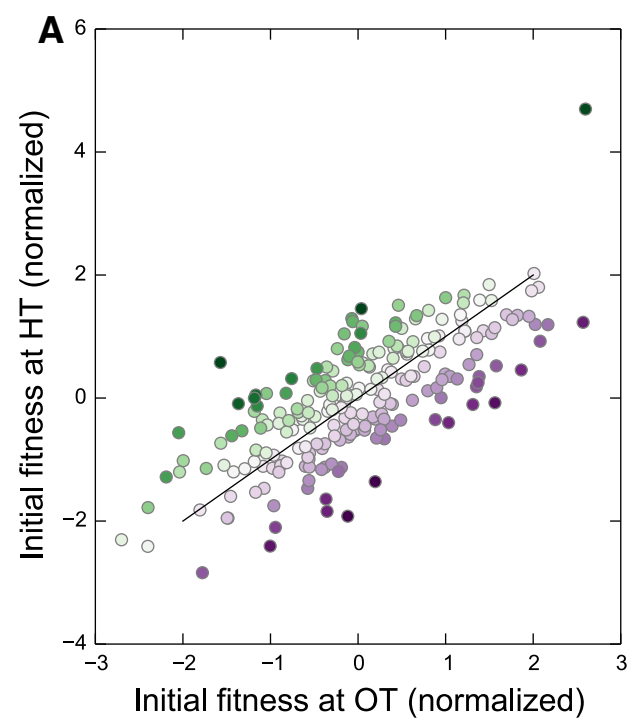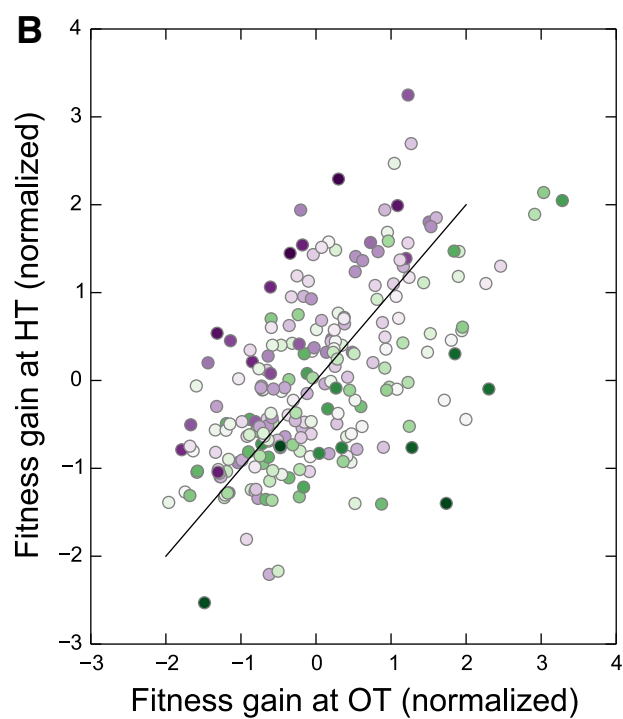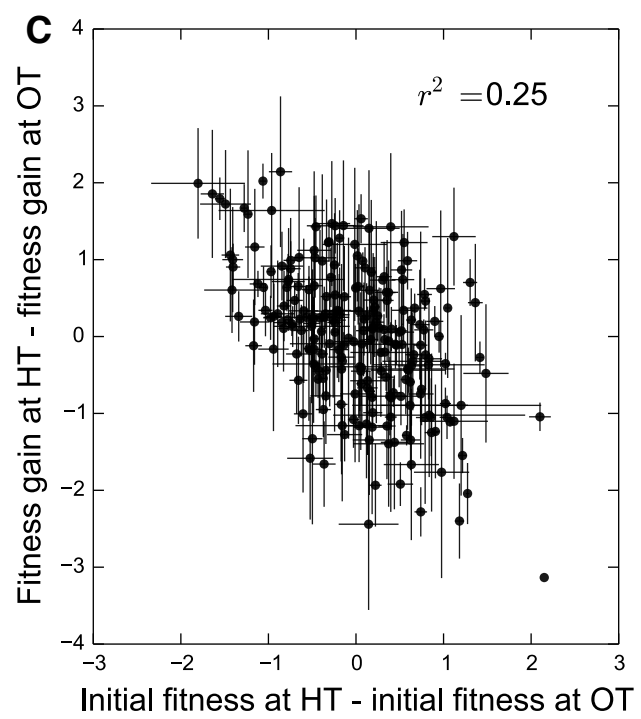

Supplement: supp [file elife-27167-supp-v1.zip]
